# Supplementary material for: Non-junctional Cx32 mediates anti-apoptotic and pro-tumor effects via epidermal growth factor receptor in human cervical cancer cells
Source: PubMed Central journal article supplement (PMC5520707; doi:10.1038/cddis.2017.183), 2017-05-11

# Supplemental figure

## HeLa-wt cells

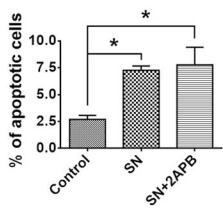

Supplement: cddis2017183x1.pdf [file cddis2017183x1.pdf]
